# Supplementary material for: Seeking tetrameric transition metal phosphonate with a D4R core and organising it into a 3-D supramolecular assembly
Source: Royal Society of Chemistry journal article supplement (doi:10.1039/b616439k), 2007-01-01
Supplement: b616439k.pdf [file b616439k.pdf]

# Supplementary Material (ESI) for Chemical Communications  
# This journal is (c) The Royal Society of Chemistry 2007

*Electronic Supplementary Information for*

**Seeking tetrameric transition metal phosphonate with a D4R  
core and Organising it into a 3-D supramolecular assembly**

**Ramaswamy Murugavel\* and Swaminathan. Shanmugan**

*Department of Chemistry, IIT-Bombay, Powai, Mumbai-400076, India*

---

*Journal: Chemical Communications*

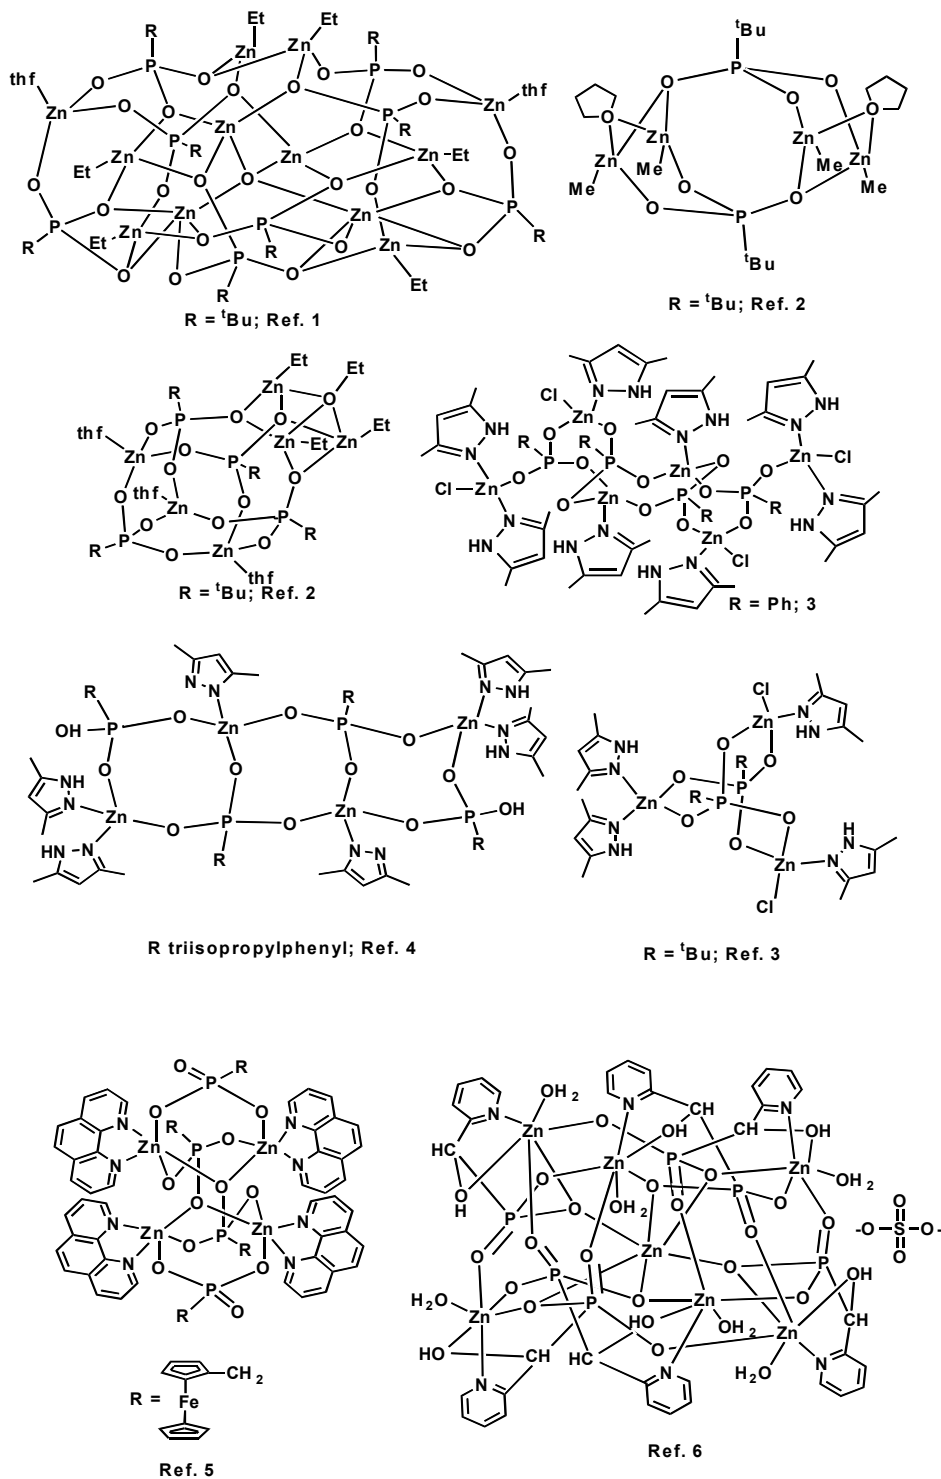

### Chart 1, Structurally Characterized Zinc Phosphonate Clusters.

**References:** (1) Y. Yang, J. Pinkas, M. Noltemeyer, H.-G. Schmidt, and H. W. Roesky, *Angew. Chem., Int. Ed.* 1999, **38**, 664-666. (2) G. Anantharaman, V. Chandrasekhar, M. G. Walawalkar, H. W. Roesky, D. Vidovic, J. Magull, M. Noltemeyer, *Dalton Trans.* 2004, 1271-1275. (3) V. Chandrasekhar, S. Kingsley, B. Rhatigan, M. K. Lam, and A. L. Rheingold, *Inorg. Chem.* 2002, **41**, 1030-1032. (4) V. Chandrasekhar, P. Sasikumar, R. Boomishankar, and G. Anantharaman, *Inorg. Chem.* 2006, **45**, 3344-3351. (5) J. Wu, Y. Song, E. Zhang, H. Hou, Y. Fan, and Y. Zhu, *Chem.-Euro. J.* 2006, **12**, 5823-5831. (6) D.-K. Cao, Y.-Z. Li and L.-M. Zheng, *Inorg. Chem.* 2005, **44**, 2984-2985.

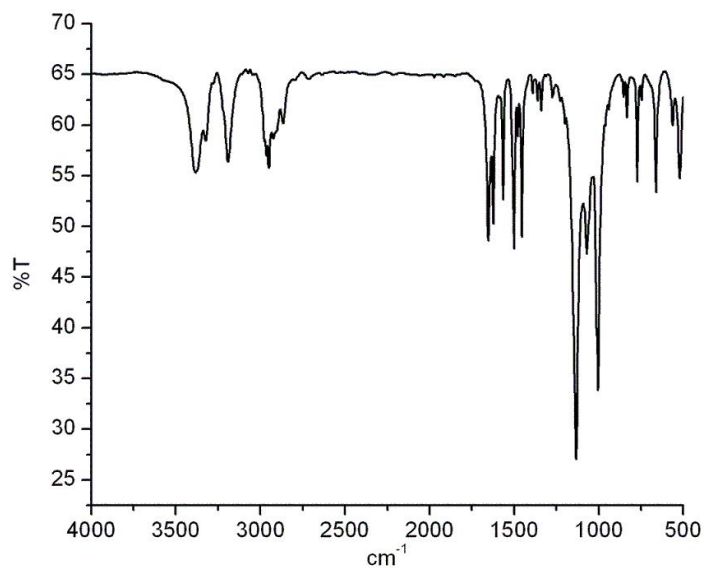

**Figure 1.** IR spectrum of  $[\text{Zn}(\text{tBuPO}_3)(\text{Py-2-NH}_2)]_4$  as KBr discs.

The compound  $[\text{Zn}(\text{tBuPO}_3)(\text{Py-2-NH}_2)]_4$  is insoluble in all solvents. The NMR tube reaction of this compound in  $\text{CD}_3\text{OD}$  shows there is an up-field shift in chemical shift value ( $\delta = 34.79$  ppm) which compared to free ligand ( $\delta = 35.5$  ppm)

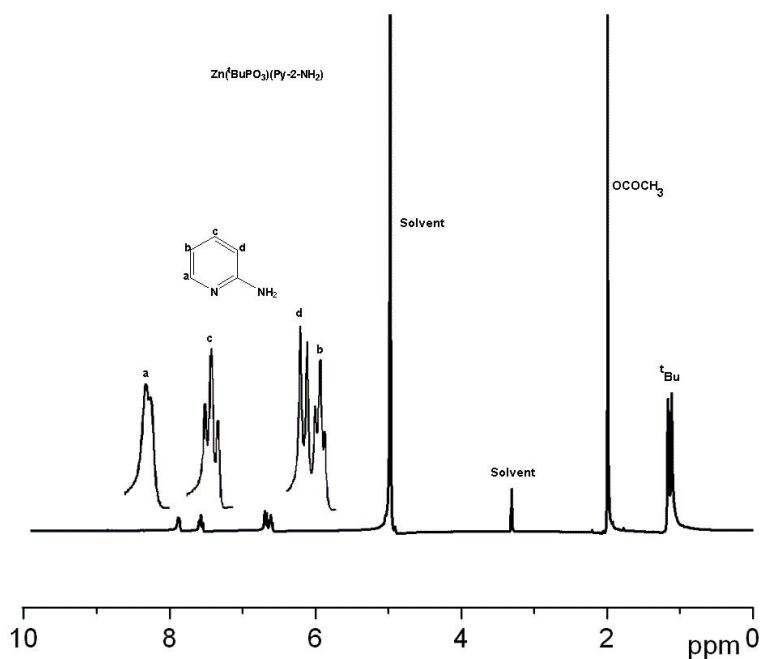

**Figure 2.** <sup>1</sup>H NMR spectrum of  $[\text{Zn}(\text{tBuPO}_3)(\text{Py-2-NH}_2)]_4$  in  $\text{CD}_3\text{OD}$ .

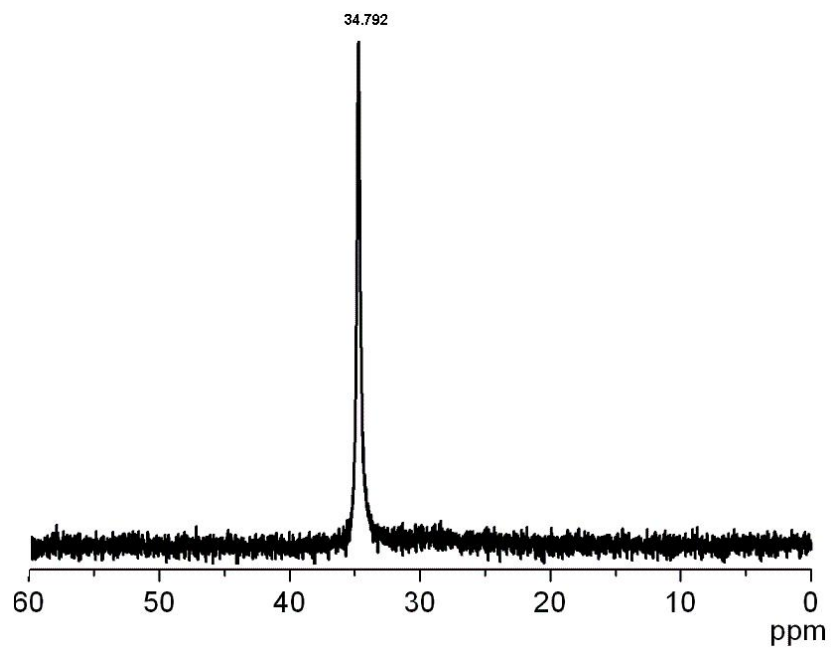

**Figure 3.**  $^{31}\text{P}$  NMR spectrum of  $[\text{Zn}(\text{tBuPO}_3)(\text{Py-2-NH}_2)]_4$  in  $\text{CD}_3\text{OD}$ .

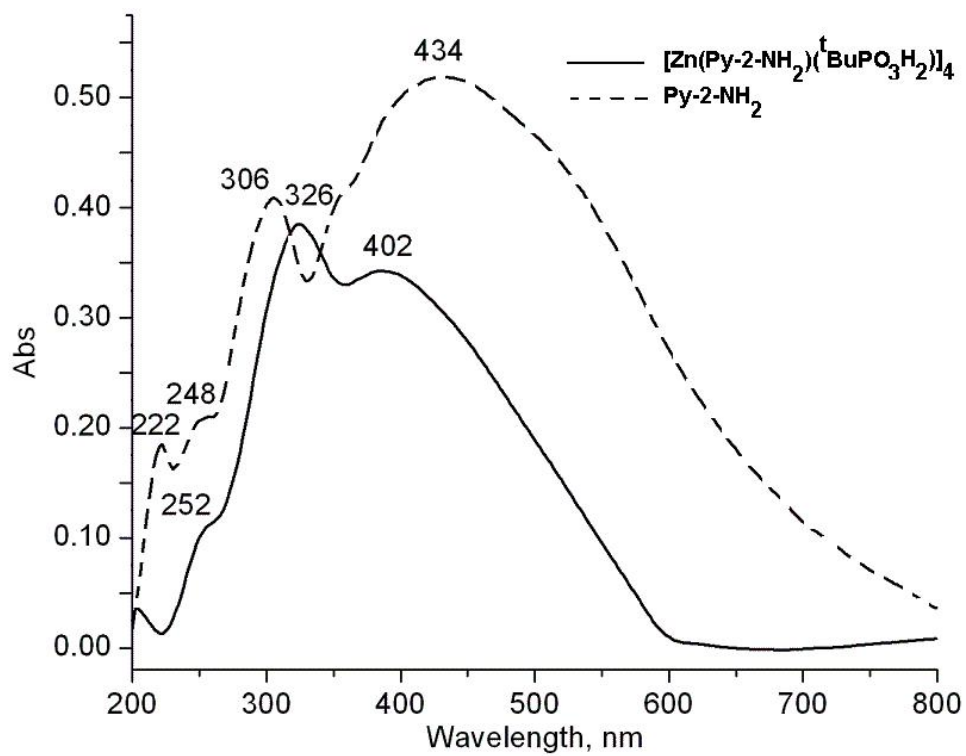

**Figure 4.** Solid State UV-vis spectra of  $[\text{Zn}(\text{Py-2-NH}_2)(\text{tBuPO}_3\text{H}_2)]_4$  and  $\text{Py-2-NH}_2$ .

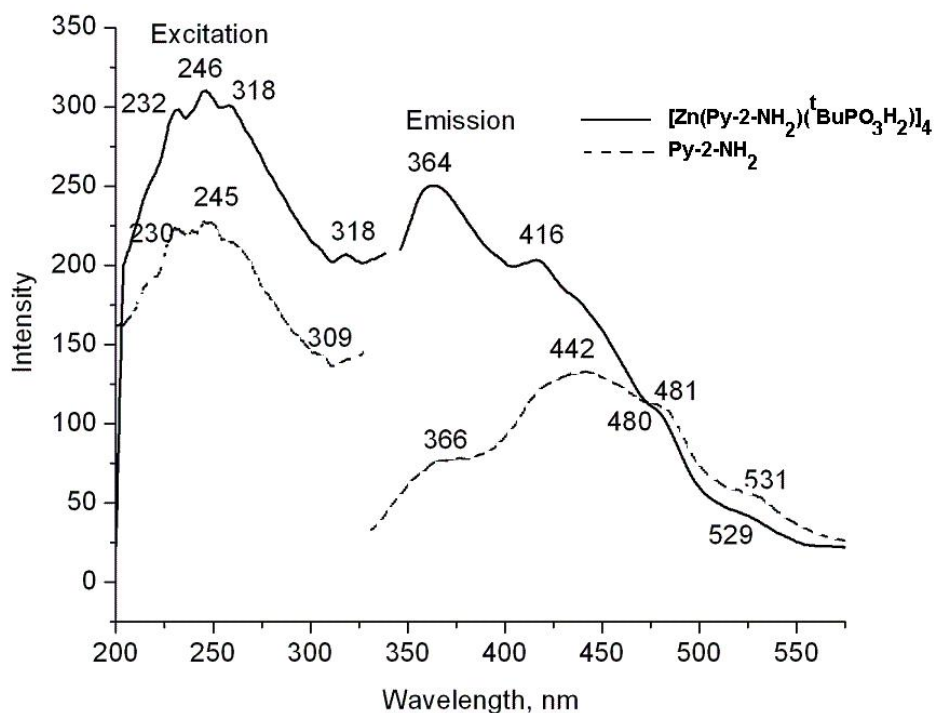

**Figure 5.** Solid State Fluorescence spectra of  $[\text{Zn}(\text{tBuPO}_3)(\text{Py-2-NH}_2)]_4$  and Py-2-NH<sub>2</sub>.

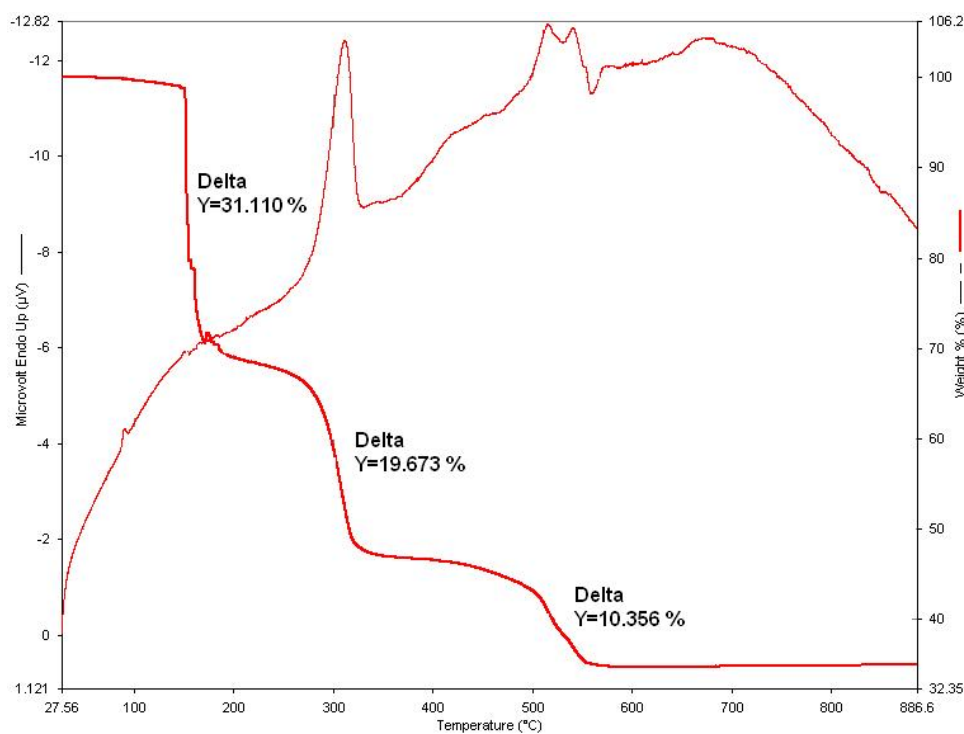

**Figure 6.** Thermal decomposition of  $[\text{Zn}(\text{tBuPO}_3)(\text{Py-2-NH}_2)]_4$ .

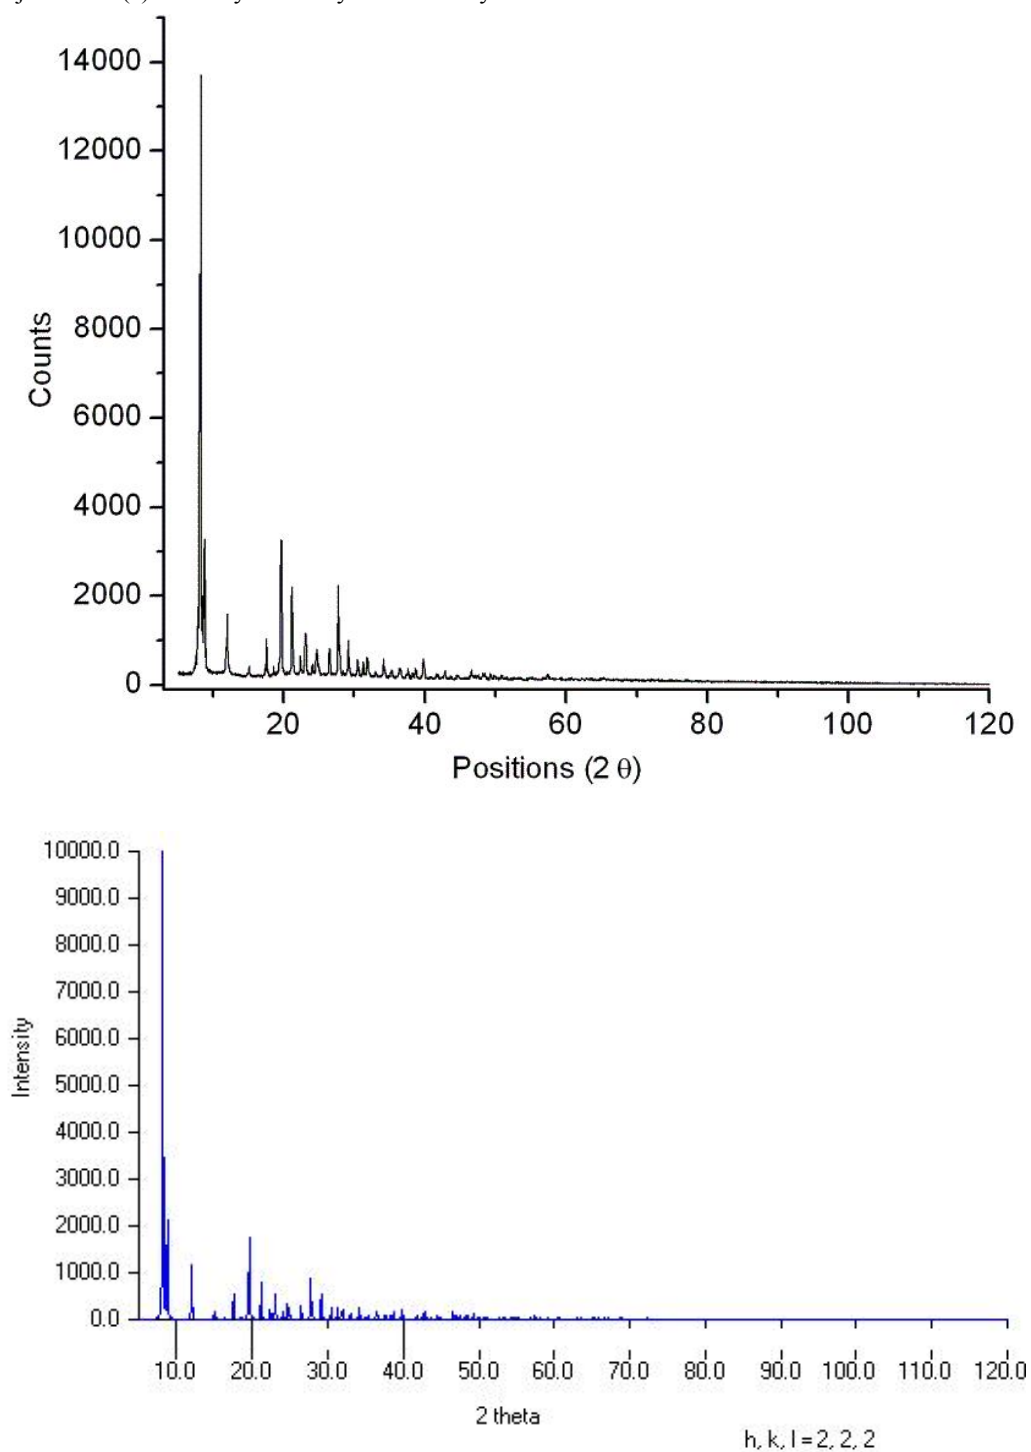

**Figure 7.** PXRD pattern of  $[\text{Zn}(\text{tBuPO}_3)(\text{Py-2-NH}_2)]_4$  (top) experimental (bottom) simulated from single crystal data.

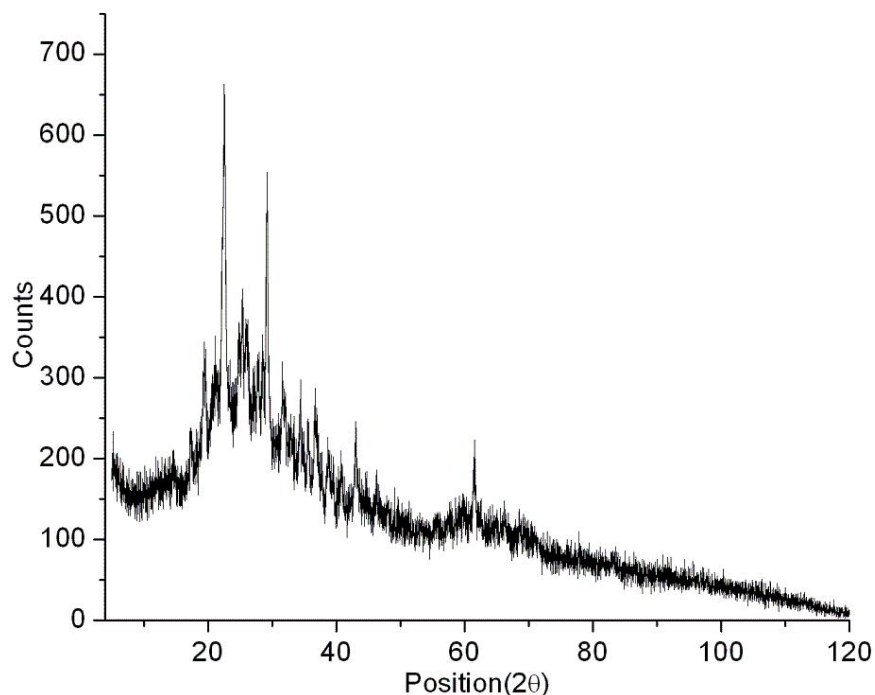

**Figure 8.** PXRD pattern of  $Zn_2P_2O_7$ , the thermal decomposition product derived from  $[Zn(tBuPO_3)(Py-2-NH_2)]_4$ .

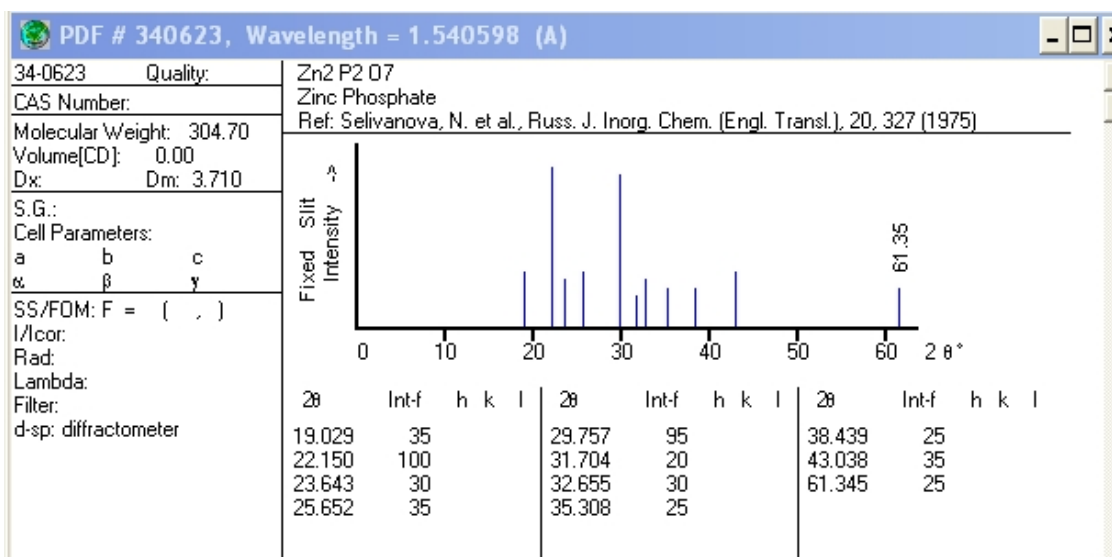

**Figure 9.** JCPDS file for  $Zn_2P_2O_7$  showing good match to the PXRD in Figure 8.

# Supplementary Material (ESI) for Chemical Communications  
# This journal is (c) The Royal Society of Chemistry 2007

**Table 1. Details of hydrogen bonds in 1.**

|           |             |              |                 |
|-----------|-------------|--------------|-----------------|
| N2-H2A    | N2...O3 (1) | H2A...O3 (1) | N2-H2A...O3 (1) |
| 0.860 (3) | 2.955 (4)   | 2.177 (2)    | 150.3 (2)       |
| N2-H2B    | N2...O1 (2) | H2B...O1 (2) | N2-H2B...O1 (2) |
| 0.860 (3) | 2.933 (4)   | 2.135 (2)    | 154.2 (2)       |

Equivalent positions:

- (1)  $y+1/4, -x+3/4, -z+3/4$
- (2)  $-x+1, -y, -z+1$
